# Supplementary material for: Impact of Prenatal Exposure to Maternal Diabetes and High-Fat Diet on Postnatal Myocardial Ketone Body Metabolism in Rats
Source: MDPI journal article supplement (doi:10.3390/ijms24043684), 2023-02-12
Supplement: s1 [file s1]

## Supplementary Tables and Figure

**Table S1. Model's maternal characteristics.**

| Parameters               | Controls<br>(mean±SD) | Combination<br>exposed<br>(mean±SD) | P value |
|--------------------------|-----------------------|-------------------------------------|---------|
| Baseline weight (g)      | 208.7±30.34           | 190.6±29.52                         | 0.105   |
| Post-Diet weight (g)     | 229.7±29.99           | 274.2±12.45*                        | 0.0017  |
| Blood glucose<br>(mg/dL) | 89.67±10.06           | 319.9±57.77*                        | <0.0001 |
| Blood ketones (mM/L)     | 0.541±0.041           | 0.681±0.177*                        | 0.017   |
| Litter size (pups)       | 13.56±2.091           | 12.73±2.257                         | 0.279   |

\* values are significantly different from control group and the significance accepted at  $P<0.05$  (n=10-13) in each group. SD-standard deviation.

**Table S2: Model's offspring characteristics**

| Parameter                  | Controls      | Combination<br>exposed | P value |
|----------------------------|---------------|------------------------|---------|
| Body weight (g)            | 6.15±0.761    | 5.81±0.672*            | 0.008   |
| Heart weight (g)           | 0.043±0.007   | 0.043±0.006            | 0.723   |
| Heart:body weight<br>ratio | 0.0071±0.0011 | 0.0075±0.0009*         | 0.044   |

\* values are significantly different from control group and the significance accepted at  $P<0.05$  (n=10-13) in each group. SD-standard deviation.

**Table S3**

**Calculations of proton efflux rate (PER) and PER related variables <sup>[25]</sup>**

| Sl. No | Parameter                                      | Equation                                                                                                                                                            |
|--------|------------------------------------------------|---------------------------------------------------------------------------------------------------------------------------------------------------------------------|
| 1      | PER (pmol H <sup>+</sup> /min)                 | ECAR (mpH/min) x BF (mmol/L/pH) x Geometric volume (μl) x Kvol                                                                                                      |
| 2      | PER <sub>Gluc</sub>                            | PER - PER <sub>mito</sub>                                                                                                                                           |
| 3      | PER <sub>mito</sub> or PER <sub>CO2</sub>      | CCF x OCR <sub>mito</sub> (whereas CCF = CO <sub>2</sub> contribution factor which is 0.6;<br>OCR <sub>mito</sub> = OCR <sub>basal</sub> - OCR <sub>Rote/AA</sub> ) |
| 4      | PER <sub>Lactate</sub>                         | PER <sub>Gluc</sub> -PER <sub>mito</sub>                                                                                                                            |
| 5      | Baseline fraction of<br>PER <sub>Lactate</sub> | PER <sub>Lactate</sub> /PER <sub>Glucose</sub>                                                                                                                      |

### PER related variables

| S<br>1. No | Variable                                          | Explanation                                                                                                                                                         |
|------------|---------------------------------------------------|---------------------------------------------------------------------------------------------------------------------------------------------------------------------|
| 1          | Extracellular acidification rate (ECAR) (mPH/min) | Rate data measured during an assay, reported as the rate of change in mpH in an assay well.                                                                         |
| 2          | Buffer factor (BF) (mmol/L/pH)                    | Measure of the <i>in situ</i> buffer capacity obtained in XF instruments, and accounts for buffer capacity of both medium and sensor system. Calculated BF is 2.689 |
| 3          | Geometric volume ( $\mu$ l)                       | Physical volume of the measurement microchamber assuming its completely sealed. Calculated geometric volume is 5.65 $\mu$ l                                         |
| 4          | Volume scaling factor (Kvol)                      | Empirically derived scaling factor used to account for total proton production in the measurement chamber. Calculated Kvol is 1.19                                  |

PER- proton efflux rate; ECAR-extracellular acidification rate; OCR-oxygen consumption rate.

**Table S4: List of Primers used for qPCR**

| Gene                           | Manufacturer                | Reference Sequence | Assay ID          | Amplicon sequence                                                                                                                                                                                                                                                         |
|--------------------------------|-----------------------------|--------------------|-------------------|---------------------------------------------------------------------------------------------------------------------------------------------------------------------------------------------------------------------------------------------------------------------------|
| <i>B2m</i>                     | Thermo Fisher               | NM_012512.2        | Rn00560865_m1     | Amplicon: CTGCTGACCGGACCGGCACGATGGCTCGCTCGGTGACCGTGATCT<br>TTCTGGTGCTTGTCTCTCTGGCCGTCGTGCTTGCCATTGAGAAAAT<br>CCCCAAATTCAAGTGTACTCTCGCCATCCACCGGAGAATGGGAAGCCCAACTTCCTCA<br>ACTGCTACGTGTCTCAGTTCCACCCACCTCAAATAGAAATTGAGCTACTGAAGAATGG<br>AAAGAAGATACCAAATATCGAG<br>ATGTCA |
| <i>Hmgcs2</i>                  | Thermo Fisher               | NM_173094.2        | Rn00597339_m1     | Amplicon: ACATGTACAC CTCGTCCCTC TACGGGTGCC TGGCCTCACT TCTCTCCAC<br>CACTCTGCCAAGAATTGGCCGGCTCCAGGATTGGAGCAT TCTCCTACGG CTCAG                                                                                                                                               |
| <i>Ppar<math>\gamma</math></i> | Thermo Fisher               | NM_001145366.1     | Rn00440945_m1     | Amplicon: TGACTTTATG GAGCCTAAGT TTGAGTTTGC TGTGAAGTTC AATGCACTGG<br>AATTAGATGA CAGTGACTTG GCCATATTTA TAGCTGTCAT TATTCTCAGT<br>GGAGACCGCC CAGGCTTGCT GAACGTGAAG CCCATCGAGG ACATCCAAGA<br>CAACCTGCTG CAGGCCCTGG AACTCCAGCT GAAGCTGAAC CACCCGGAGT<br>CCTCCCAGCTG             |
| <i>Cpt1<math>\alpha</math></i> | Thermo Fisher               | NM_031559.2        | Rn00580702_m1     | Amplicon: TAAAGGAGAC ACCAACCCCA ACATCCCTAA GCCCACAAGG<br>CTACAATGGG ACATTCCAGG AGAGTGCCAG GAGGTCATAG ATGCATCCCT<br>GAGCAGCGCC AGTCTTTTGG CAAATGATGT GGACCTGCA                                                                                                             |
| <i>Pgc1<math>\alpha</math></i> | Integrated DNA Technologies | NM_031347          | Rn.PT.58.37655048 | Probe: 5'/56-FAM/CATACACAA/ZEN/CCGCAG<br>TCGCAACATG/3IABkGQ/-3'<br>P1: 5'-GGTCAGAGGAAGAGATAAAGTTGT-3'<br>P2: 5'-ACCCACAGAGAACAGAAACAG-3'                                                                                                                                  |

**Table S5: Effect of UK5099 on neonatal cardiomyocyte respiration**

| Group                           | Mean OCR<br>(pMol/min/1,000<br>cells) | SEM   | Different from<br>basal<br>(p value) | Different from<br>UK099 alone<br>(p value) |
|---------------------------------|---------------------------------------|-------|--------------------------------------|--------------------------------------------|
| Control Basal                   | 4.291                                 | 0.398 | NA                                   | P>0.9999                                   |
| Control UK5099                  | 4.261                                 | 0.505 | NS, P>0.9999                         | NA                                         |
| Control +1.5mM $\beta$ OHB      | 4.657                                 | 0.550 | NS, P=0.9976                         | NS, P=0.9960                               |
| Control + 4.5mM $\beta$ OHB     | 4.423                                 | 0.394 | NS, P>0.9999                         | NS, P>0.9999                               |
| Combination Basal               | 3.943                                 | 0.170 | NS, P=0.9985                         | NS, P=0.9991                               |
| Combination UK5099              | 3.668                                 | 0.319 | NS, P=0.9952                         | NS, P=0.9632                               |
| Combination + 1.5mM $\beta$ OHB | 4.083                                 | 0.336 | NS, P>0.9999                         | NS, P>0.9999                               |
| Combination + 4.5mM $\beta$ OHB | 4.362                                 | 0.281 | NS, P>0.9999                         | NS, P>0.9999                               |

UK5099- mitochondrial pyruvate carrier inhibitor; OCR- oxygen consumption rate; SEM- standard error of the mean;  $\beta$ OHB-beta-hydroxybutyrate; NA- not applicable; NS- not significant from untreated control by 1-way ANOVA.

**Table S6: Effect of UK5099 on neonatal cardiomyocyte glycolysis**

| Group                           | Mean ECAR<br>(pMol/min/1,000<br>cells) | SEM    | Different from<br>basal<br>(p value) | Different from<br>UK099 alone<br>(p value) |
|---------------------------------|----------------------------------------|--------|--------------------------------------|--------------------------------------------|
| Control Basal                   | 0.1837                                 | 0.0215 | NA                                   | NS, P>0.9999                               |
| Control UK5099                  | 0.1909                                 | 0.0260 | NS, P>0.9999                         | NA                                         |
| Control +1.5mM $\beta$ OHB      | 0.1755                                 | 0.0253 | NS, P>0.9999                         | NS, P>0.9999                               |
| Control + 4.5mM $\beta$ OHB     | 0.1575                                 | 0.0149 | NS, P=0.9997                         | NS, P=9986                                 |
| Combination Basal               | 0.2706                                 | 0.0544 | NS, P=0.7724                         | NS, P=0.8409                               |
| Combination UK5099              | 0.2609                                 | 0.0397 | NS, P=0.8614                         | NS, P=0.9124                               |
| Combination + 1.5mM $\beta$ OHB | 0.2374                                 | 0.0501 | NS, P=0.9789                         | NS, P=0.9905                               |
| Combination + 4.5mM $\beta$ OHB | 0.2594                                 | 0.0653 | NS, P=0.8730                         | NS, P=0.9211                               |

UK5099-mitochondrial pyruvate carrier inhibitor; ECAR- extracellular acidification rate; SEM- standard error of the mean;  $\beta$ OHB-beta-hydroxybutyrate; NA- not applicable; NS- not significant by one-way ANOVA.

**Table S7: Control and combination exposure differences in KST by sex**

| Parameter                            | Sex | 0 mM<br>Controls | 0 mM<br>Combination | 1.5 mM<br>Controls | 1.5 mM<br>Combination | 4.5 mM<br>Controls | 4.5 mM<br>Combination    | P value<br>(0 mM) | P value<br>(1.5 mM) | P value<br>(4.5<br>mM) |
|--------------------------------------|-----|------------------|---------------------|--------------------|-----------------------|--------------------|--------------------------|-------------------|---------------------|------------------------|
| Basal<br>respiration                 | M   | 3.619±0.433      | 3.177±0.201         | 3.414±0.504        | 2.989±0.247           | 3.282±0.502        | 2.935±0.260              | 0.428             | 0.662               | 0.930                  |
|                                      | F   | 3.198±0.425      | 3.124±0.274         | 3.097±0.424        | 2.904±0.264           | 3.159±0.417        | 3.106±0.361              | >0.99             | >0.99               | 0.841                  |
| Ketone<br>oxidation                  | M   | -0.091±0.337     | -0.063±0.297        | -0.409±0.361       | -0.270±0.47           | 0.205±0.189        | 0.656±0.380              | 0.792             | 0.662               | 0.792                  |
|                                      | F   | -0.091±0.099     | -0.585±0.397        | 0.633±0.512        | 0.694±0.269           | 0.288±0.117        | 0.365±0.482              | 0.547             | 0.841               | 0.420                  |
| Maximal<br>respiration               | M   | 6.377±0.849      | 7.496±1.117         | 6.614±0.707        | 5.992±0.963           | 8.591±1.095        | 8.237±0.898              | 0.662             | 0.662               | 0.662                  |
|                                      | F   | 7.795±1.481      | 5.267±1.390         | 7.73±1.297         | 6.010±0.997           | 8.762±1.710        | 8.372±0.861              | 0.150             | 0.420               | >0.99                  |
| Spare<br>respiratory<br>capacity     | M   | 2.755±0.952      | 4.32±1.114          | 3.197±0.662        | 3.003±1.064           | 5.306±1.062        | 5.302±0.787              | 0.329             | 0.930               | 0.930                  |
|                                      | F   | 4.539±1.137      | 2.143±1.484         | 4.576±1.117        | 3.106±1.114           | 5.547±1.392        | 5.265±0.751              | 0.222             | 0.690               | >0.99                  |
| Glucose<br>mediated OCR              | M   | 1.030±0.487      | 1.152±0.309         | 1.362±0.439        | 1.434±0.5276          | 1.578±0.469        | 2.412±0.868 <sup>a</sup> | >0.99             | >0.99               | 0.737                  |
|                                      | F   | 1.098±0.357      | 0.964±0.607         | 0.9860±1.280       | 1.766±1.271           | 1.786±0.410        | 2.098±0.807              | >0.99             | 0.847               | >0.99                  |
| Non-mitochon<br>drial<br>respiration | M   | 0.957±0.214      | 0.824±0.117         | 1.015±0.158        | 1.012±0.126           | 1.148±0.214        | 1.066±0.105              | 0.329             | 0.930               | 0.536                  |
|                                      | F   | 0.927±0.159      | 0.760±0.163         | 1.028±0.178        | 0.980±0.130           | 0.968±0.171        | 0.778±0.139              | 0.690             | >0.99               | 0.222                  |
| Basal<br>ECAR                        | M   | 0.181±0.07       | 0.25±0.158          |                    |                       |                    |                          | 0.836             |                     |                        |
|                                      | F   | 0.186±0.08       | 0.29±0.198          |                    |                       |                    |                          | 0.624             |                     |                        |
| Ketone<br>mediated<br>ECAR           | M   | 0.003±0.02       | 0.012±0.04          | -0.011±0.02        | -0.04±0.06            | -0.02±0.019        | -0.010±0.04              | 0.99              | 0.77                | 0.99                   |
|                                      | F   | 0.012±0.025      | -0.036±0.058        | 0.001±0.030        | -0.023±0.039          | -0.03±0.048        | -0.011±0.03              | 0.46              | 0.928               | 0.925                  |
| Maximal                              | M   | 0.050±0.029      | 0.0094±0.029        | 0.061±0.018        | -0.008±0.025          | 0.057±0.018        | 0.140±0.078              | 0.329             | 0.125               | 0.930                  |

|                                         |   |              |              |              |              |              |                          |       |       |       |
|-----------------------------------------|---|--------------|--------------|--------------|--------------|--------------|--------------------------|-------|-------|-------|
| ECAR                                    | F | -0.014±0.013 | -0.038±0.029 | -0.012±0.020 | 0.0121±0.038 | -0.0118±0.02 | 0.111±0.058              | 0.309 | 0.690 | 0.095 |
| Glucose mediated ECAR                   | M | 0.11±0.09    | 0.091±0.06   | 0.0125±0.058 | 0.051±0.034  | 0.131±0.077  | 0.241±0.251 <sup>b</sup> | >0.99 | 0.99  | 0.913 |
|                                         | F | 0.05±0.04    | -0.0008±0.05 | 0.073±0.04   | 0.124±0.14   | 0.07±0.09    | 0.221±0.193              | 0.99  | >0.99 | 0.72  |
| Anaerobic ECAR                          | M | 0.592±0.142  | 0.865±0.181  | 0.4905±0.102 | 0.651±0.162  | 0.696±0.164  | 0.826±0.171              | 0.125 | 0.428 | 0.662 |
|                                         | F | 0.874±0.215  | 0.688±0.147  | 0.660±0.161  | 0.457±0.125  | 0.772±0.215  | 0.827±0.145 <sup>*</sup> | 0.690 | 0.547 | 0.841 |
| Basal PER                               | M | 1.655±0.260  | 1.674±0.252  | NA           | NA           | NA           | NA                       | 0.329 | NA    | NA    |
|                                         | F | 1.698±0.331  | 1.924±0.519  | NA           | NA           | NA           | NA                       | 0.690 | NA    | NA    |
| B-HOB PER                               | M | 1.676±0.300  | 1.768±0.148  | 1.512±0.282  | 1.442±0.085  | 1.499±0.223  | 1.468±0.162              | 0.329 | 0.662 | 0.792 |
|                                         | F | 1.819±0.412  | 1.872±0.186  | 1.707±0.410  | 1.723±0.233  | 1.359±0.153  | 1.799±0.275              | 0.547 | 0.547 | 0.222 |
| FCCP PER                                | M | 7.054±1.231  | 8.947±2.063  | 6.127±0.999  | 5.411±0.730  | 8.002±1.511  | 7.914±1.605              | 0.536 | 0.609 | >0.99 |
|                                         | F | 9.672±2.254  | 7.676±1.672  | 7.723±1.741  | 5.163±0.907  | 8.737±2.125  | 8.311±1.516              | 0.547 | 0.690 | >0.99 |
| Glucose PER                             | M | 2.691±0.459  | 2.32±0.327   | 2.846±0.423  | 2.260±0.264  | 2.854±0.419  | 3.219±0.668              | >0.99 | 0.536 | 0.792 |
|                                         | F | 2.223±0.277  | 2.081±0.147  | 2.366±0.267  | 2.442±0.495  | 2.442±0.313  | 3.256±0.465              | >0.99 | 0.841 | 0.222 |
| Rot/AA PER                              | M | 2.11±0.374   | 1.828±0.301  | 2.211±0.323  | 1.681±0.189  | 2.176±0.310  | 2.523±0.576              | 0.792 | 0.428 | 0.792 |
|                                         | F | 1.566±0.256  | 1.70±0.118   | 1.582±0.223  | 1.877±0.374  | 1.591±0.159  | 2.577±0.371              | 0.690 | 0.841 | 0.095 |
| Glucose mediated PER <sub>Lactate</sub> | M | 1.984±0.408  | 1.629±0.262  | 2.029±0.358  | 1.441±0.144  | 1.922±0.356  | 1.886±0.502              | 0.930 | 0.329 | 0.792 |
|                                         | F | 1.574±0.192  | 1.502±0.109  | 1.446±0.200  | 1.384±0.235  | 1.35±0.258   | 1.997±0.354              | 0.841 | 0.841 | 0.222 |
| Glucose mediated PER <sub>CO2</sub>     | M | 0.706±0.065  | 0.690±0.08   | 0.817±0.107  | 0.818±0.161  | 0.946±0.115  | 1.33±0.184               | >0.99 | 0.662 | 0.246 |
|                                         | F | 0.658±0.096  | 0.578±0.163  | 0.920±0.115  | 0.731±0.121  | 1.072±0.109  | 1.259±0.216              | 0.420 | 0.285 | 0.690 |
| Maximal PER <sub>Lactate</sub>          | M | 3.310±1.877  | 5.363±3.348  | 2.318±1.449  | 3.337±3.052  | 3.173±3.735  | 3.294±3.171              | 0.983 | >0.99 | >0.99 |
|                                         | F | 5.011±3.088  | 4.406±2.695  | 3.145±2.438  | 1.630±1.235  | 3.477±3.216  | 2.731±2.687              | >0.99 | 0.99  | >0.99 |

|                         |   |              |             |             |             |             |             |       |       |       |
|-------------------------|---|--------------|-------------|-------------|-------------|-------------|-------------|-------|-------|-------|
| Maximal                 | M | 3.735±1.251  | 3.596±1.733 | 3.803±1.353 | 3.934±1.303 | 4.822±2.062 | 4.604±1.140 | >0.99 | >0.99 | >0.99 |
| PER <sub>CO2</sub>      | F | 4.652±1.998  | 3.241±1.808 | 4.646±1.743 | 3.258±1.214 | 5.254±2.293 | 5.354±1.071 | 0.963 | 0.967 | >0.99 |
| Baseline                | M | 0.713±0.034  | 0.697±0.024 | 0.704±0.031 | 0.643±0.041 | 0.660±0.044 | 0.562±0.036 | 0.536 | 0.329 | 0.125 |
| fraction PER<br>lactate | F | 0.7049±0.019 | 0.733±0.058 | 0.607±0.037 | 0.591±0.050 | 0.544±0.039 | 0.606±0.044 | 0.309 | >0.99 | 0.420 |

Values are represented as mean±SD (n=6 for control males and n=5 for combination males; n=5 for control females and combination females). \* indicates values are significantly different from 0 mM combination females (p=0.044). <sup>a</sup> indicates values shows a trend towards significance (p=0.088) compared to 0mM control males. <sup>b</sup> indicates values are significantly different from 0 mM combination males (p=0.049). OCR-oxygen consumption rate; ECAR-extracellular acidification rate; PER-proton efflux rate; Rot-Rotenone; AA-Antimycin A; βHOB- β-hydroxybutyrate; FCCP- Carbonyl cyanide 4-(trifluoromethoxy)phenylhydrazone, M-male; F-female. mM refers to the progressive amount of βHOB supplied.

**Table S8: Sex-specific differences in KST**

| Parameter                       | P value (male vs female; 0mM Controls) | P value male vs female (0mM Combination) | P value (male vs female; 1.5 mM Controls) | P value (male vs female; 1.5 mM Combination) | P value (male vs female; 4.5 mM Controls) | P value (male vs female 4.5 mM; Combination) |
|---------------------------------|----------------------------------------|------------------------------------------|-------------------------------------------|----------------------------------------------|-------------------------------------------|----------------------------------------------|
| Basal respiration               | 0.428                                  | 0.841                                    | 0.662                                     | 0.841                                        | >0.999                                    | 0.690                                        |
| Ketone oxidation                | >0.999                                 | 0.3095                                   | 0.329                                     | 0.150                                        | >0.999                                    | 0.420                                        |
| Maximal respiration             | 0.662                                  | 0.309                                    | 0.536                                     | 0.841                                        | 0.930                                     | 0.841                                        |
| Spare respiratory capacity      | 0.246                                  | 0.309                                    | 0.329                                     | >0.999                                       | 0.930                                     | 0.841                                        |
| Glucose mediated OCR            | >0.999                                 | >0.999                                   | 0.992                                     | 0.998                                        | >0.999                                    | >0.999                                       |
| Non-mitochondrial respiration   | 0.930                                  | 0.547                                    | 0.792                                     | 0.841                                        | 0.536                                     | 0.222                                        |
| Basal ECAR                      | >0.999                                 | 0.965                                    |                                           |                                              |                                           |                                              |
| Ketone mediated ECAR            | >0.999                                 | 0.744                                    | >0.999                                    | 0.849                                        | >0.999                                    | >0.999                                       |
| Maximal ECAR                    | 0.246                                  | 0.690                                    | 0.246                                     | 0.547                                        | >0.999                                    | >0.999                                       |
| Glucose mediated ECAR           | 0.999                                  | 0.980                                    | 0.999                                     | 0.997                                        | 0.999                                     | >0.999                                       |
| Anaerobic ECAR                  | 0.082<br>(♂ < ♀)                       | 0.222                                    | 0.030<br>(♂ < ♀)                          | 0.841                                        | 0.051<br>(♂ < ♀)                          | >0.999                                       |
| Basal PER                       | 0.792                                  | 0.309                                    |                                           |                                              |                                           |                                              |
| B-OHB PER                       | 0.930                                  | 0.690                                    | 0.930                                     | 0.690                                        | >0.999                                    | 0.420                                        |
| FCCP PER                        | 0.428                                  | 0.841                                    | 0.536                                     | 0.904                                        | 0.930                                     | >0.999                                       |
| Glucose PER                     | 0.536                                  | >0.999                                   | 0.428                                     | 0.841                                        | 0.662                                     | 0.841                                        |
| Rot/AA PER                      | 0.428                                  | 0.246                                    | 0.246                                     | 0.841                                        | 0.841                                     | 0.690                                        |
| Glucose mediated PER<br>Lactate | 0.662                                  | >0.999                                   | 0.246                                     | 0.841                                        | 0.246                                     | 0.690                                        |
| Glucose mediated PER CO2        | 0.662                                  | 0.309                                    | 0.662                                     | 0.730                                        | 0.428                                     | >0.999                                       |



|                               |        |        |                                 |        |                                 |        |
|-------------------------------|--------|--------|---------------------------------|--------|---------------------------------|--------|
| Maximal PER Lactate           | >0.999 | >0.999 | >0.999                          | >0.999 | 0.997                           | >0.999 |
| Maximal PER CO2               | 0.998  | >0.999 | 0.998                           | >0.999 | >0.999                          | 0.998  |
| Baseline fraction PER lactate | 0.792  | 0.420  | 0.082<br>( $\sigma > \varphi$ ) | 0.690  | 0.051<br>( $\sigma > \varphi$ ) | 0.420  |

OCR-oxygen consumption rate; ECAR-extracellular acidification rate; PER-proton efflux rate; Rot-Rotenone; AA-Antimycin A;  $\beta$ HOB-  $\beta$ -hydroxybutyrate; FCCP- Carbonyl cyanide 4-(trifluoromethoxy)phenylhydrazone.

**Table S9: Sex-specific differences in gene expression**

| Parameter                  | Sex | Fold change  |              | P value<br>(male vs female;<br>controls) | P value<br>(male vs female;<br>combination) |
|----------------------------|-----|--------------|--------------|------------------------------------------|---------------------------------------------|
|                            |     | Control      | Combination  |                                          |                                             |
| <i>Cpt1a</i> (Fold change) | M   | 0.258±1.445  | -0.341±1.169 | 0.937                                    | 0.142                                       |
|                            | F   | 1.7±0.642    | 0.1867±1.56  |                                          |                                             |
| <i>Hmgcs2</i>              | M   | -0.360±1.27  | 1.84±0.688   | 0.937                                    | <i>0.002</i><br>(σ>♀)                       |
|                            | F   | 0.248±1.476  | -2.442±1.195 |                                          |                                             |
| <i>Bdh1</i>                | M   | -0.515±1.771 | 1.812±0.370  | >0.999                                   | <i>0.002</i><br>(σ>♀)                       |
|                            | F   | -0.515±1.702 | -0.566±1.455 |                                          |                                             |
| <i>Pparg</i>               | M   | -0.066±1.479 | 1.695±0.540  | 0.974                                    | 0.225                                       |
|                            | F   | -0.338±1.139 | 0.690±1.396  |                                          |                                             |
| <i>Pgc1a</i>               | M   | -0.036±1.372 | 2.238±0.459  | 0.818                                    | 0.240                                       |
|                            | F   | -0.798±1.437 | 4.122±2.430  |                                          |                                             |

*Cpt1a*- carnitine palmitoyl transferase 1a; *Hmgcs2*-3-hydroxy-3-methylglutaryl-CoA synthase 2; *Bdh1*- β-hydroxy butyrate dehydrogenase; *Pparg*-Peroxisome proliferator-activated receptor γ; *Pgc1a*-Peroxisome proliferator-activated receptor γ coactivator-1.

Figure S1. Non-mitochondrial respiration and Basal PER.tif

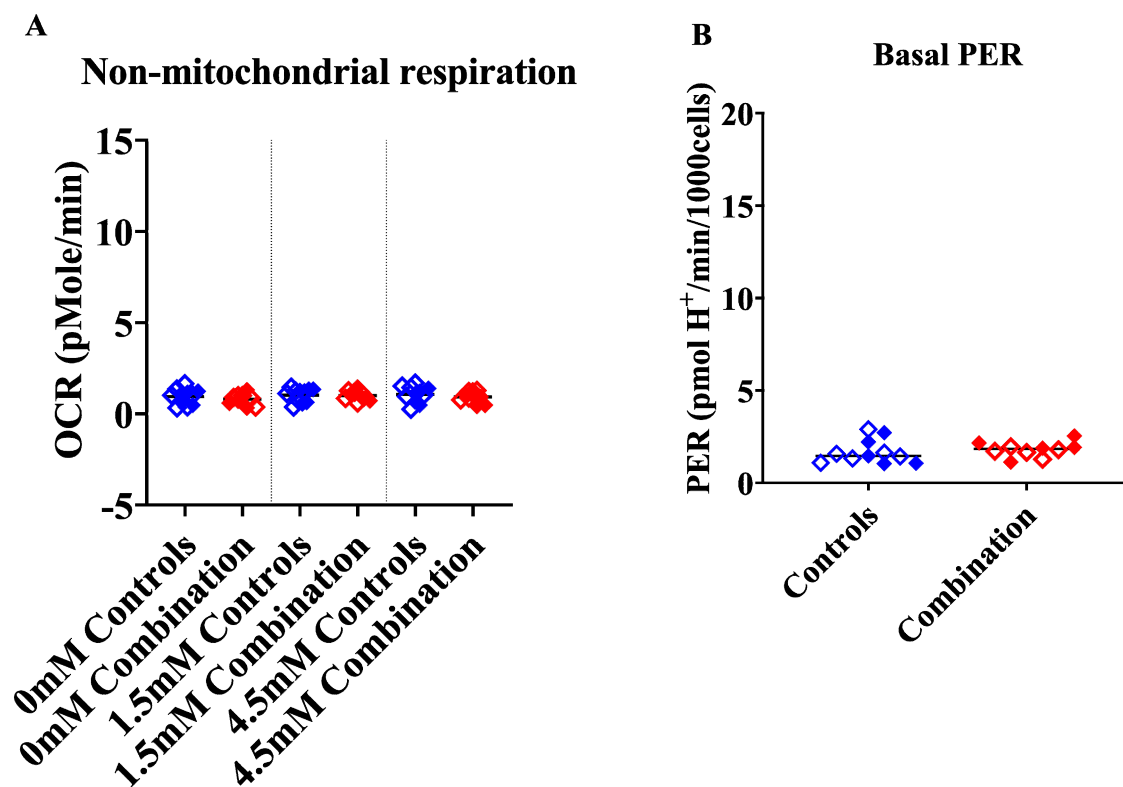

Figure S1. Non-mitochondrial respiration and Basal PER were not different in control and combination exposed groups. (A) Non-mitochondrial respiration, (B) Basal PER. Open symbols in the graph indicate males and filled symbols indicate females. Bars represent mean OCR (n=10-11 litter per group).
